# Supplementary material
Source: PubMed Central journal article supplement (PMC5925802)
Supplement: supp_RA117.000710_133552_1_supp_52996_p2vmxt.pdf [file supp_RA117.000710_133552_1_supp_52996_p2vmxt.pdf]

## 2D class averages

**A** 8,178 particles

50 classes

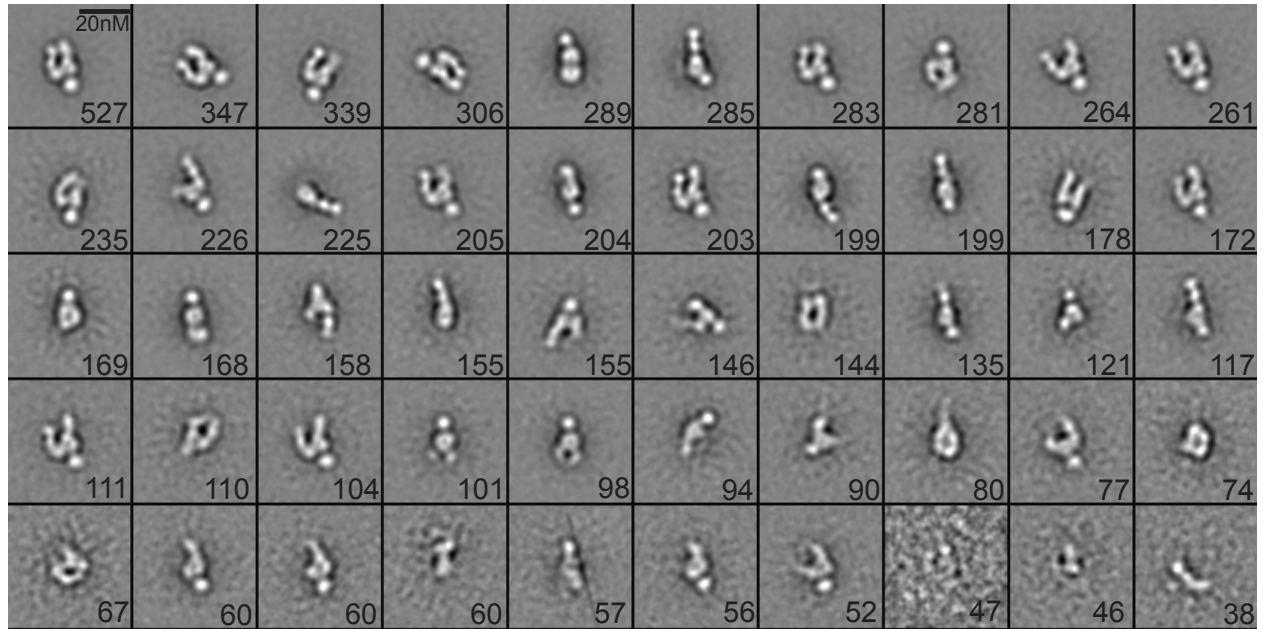

**B** 6,878 particles

20 classes

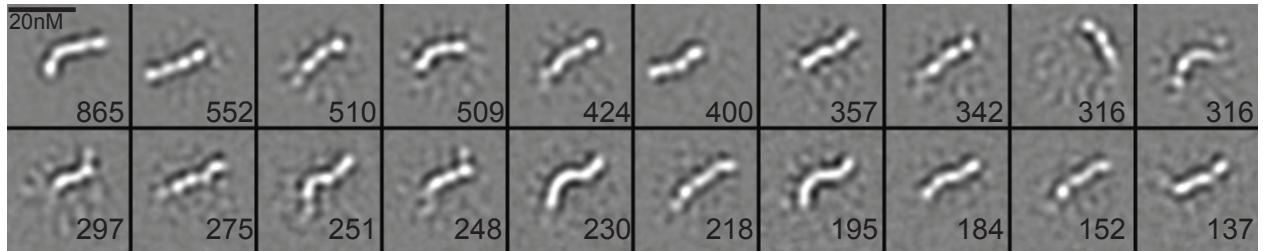

**Figure S2.** EM class averages of negatively stained **(A)** LFA-1 headpiece in Mg<sup>2+</sup>/Ca<sup>2+</sup> and **(B)** ICAM-1 ectodomain in Mn<sup>2+</sup>/Ca<sup>2+</sup>.
