# Supplementary material
Source: PubMed Central journal article supplement (PMC5925802)
Supplement: supp_RA117.000710_133552_1_supp_52997_p22mxt.pdf [file supp_RA117.000710_133552_1_supp_52997_p22mxt.pdf]

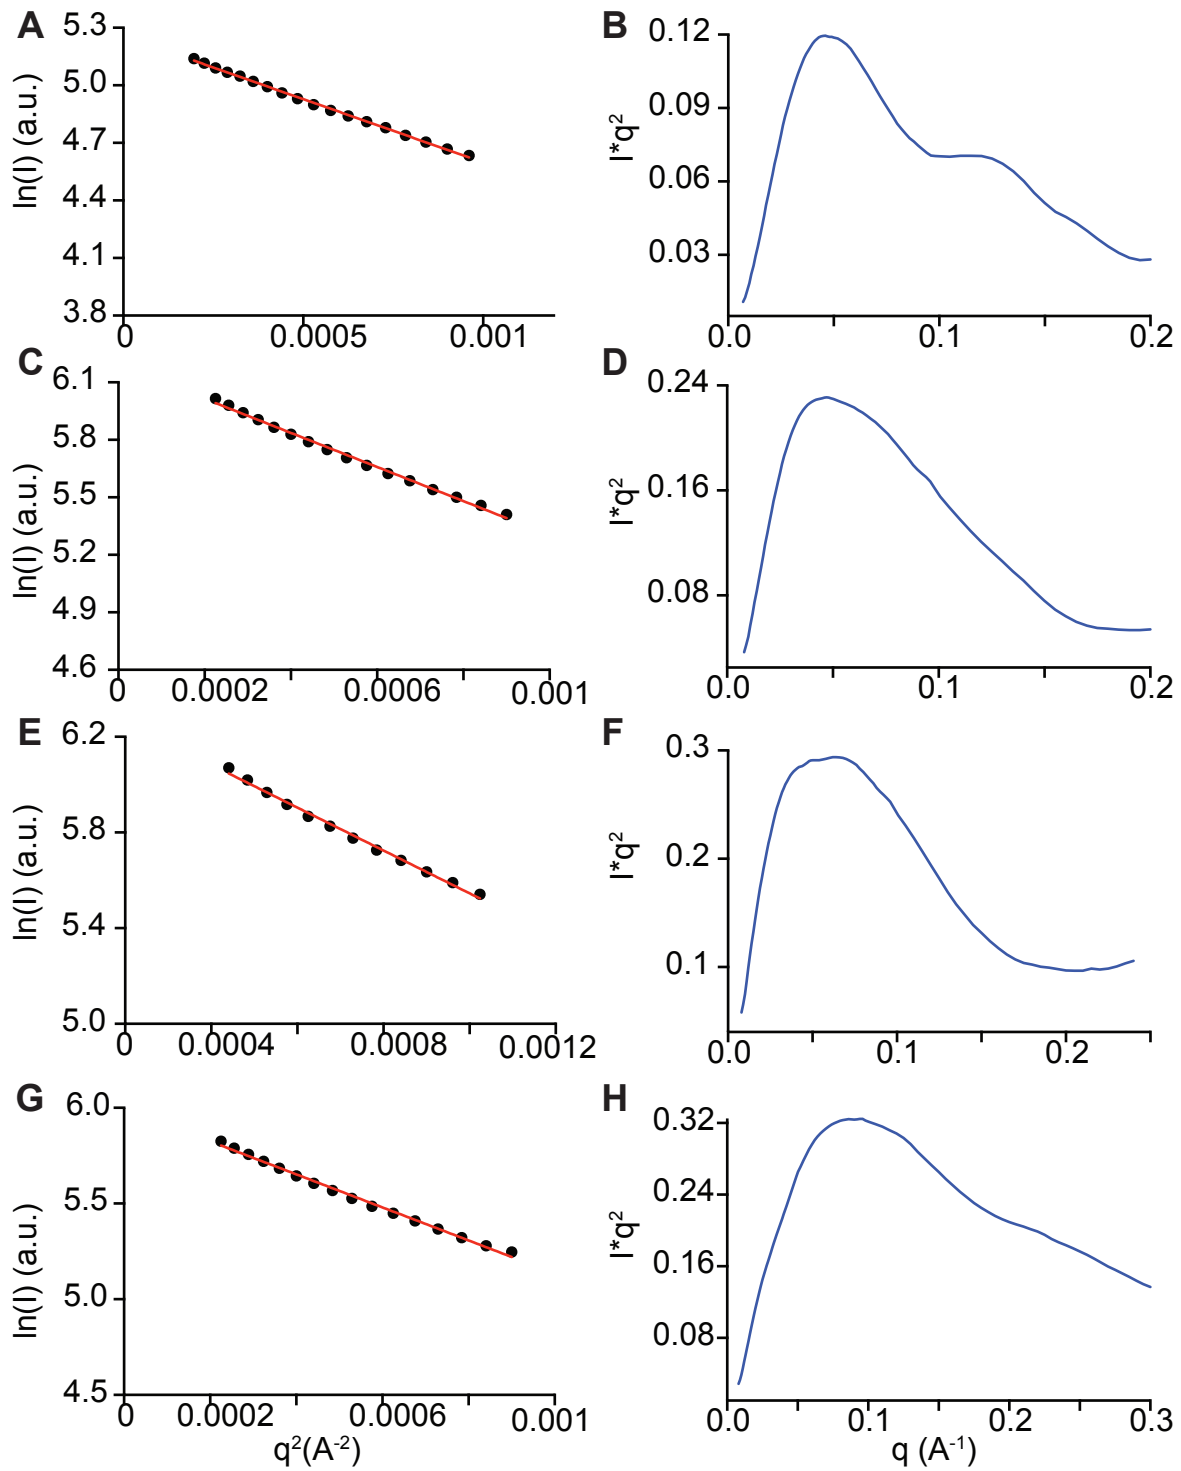

**Figure S3.** Guinier and Kratky plots of LFA-1 headpiece in (A,B)  $Mg^{2+}/Ca^{2+}$ , (C,D)  $Mn^{2+}/Ca^{2+}$ , (E,F) LFA-1 headpiece complexed with ICAM1 D1D5 in  $Mn^{2+}/Ca^{2+}$  and (G,H) ICAM1 D1D5 in  $Mn^{2+}/Ca^{2+}$ .
